# Supplementary material for: Block copolymer reduces, protects and mediates oriented growth into nano/submicron branched platinum
Source: Royal Society of Chemistry journal article supplement (doi:10.1039/c2jm31542d), 2012-01-01
Supplement: c2jm31542d.pdf [file c2jm31542d.pdf]

## Block Copolymer Reduce, Protect and Mediate Oriented Growth into Nano-Submicron Branched Platinum

### Supporting Information

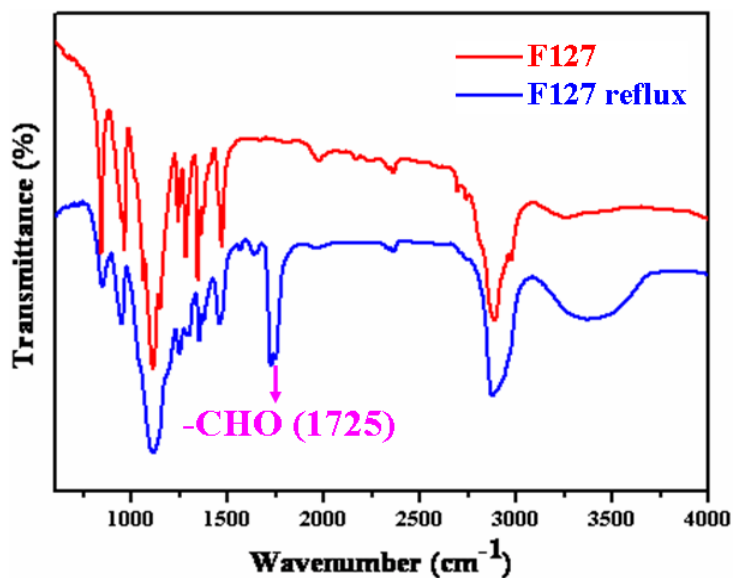

**Fig. S1** Fourier Transform Infrared Spectrum (FTIR) of pure Pluronic F127 and after reflux.

---

\* College of Environmental & Energy Engineering, Beijing University of Technology, Pingleyuan100, Chaoyang district 100124, Beijing, P.R.China. Tel: 86-010-67396474; Fax: 86-010-67396474; Email: [zhanglj1997@bjut.edu.cn](mailto:zhanglj1997@bjut.edu.cn)

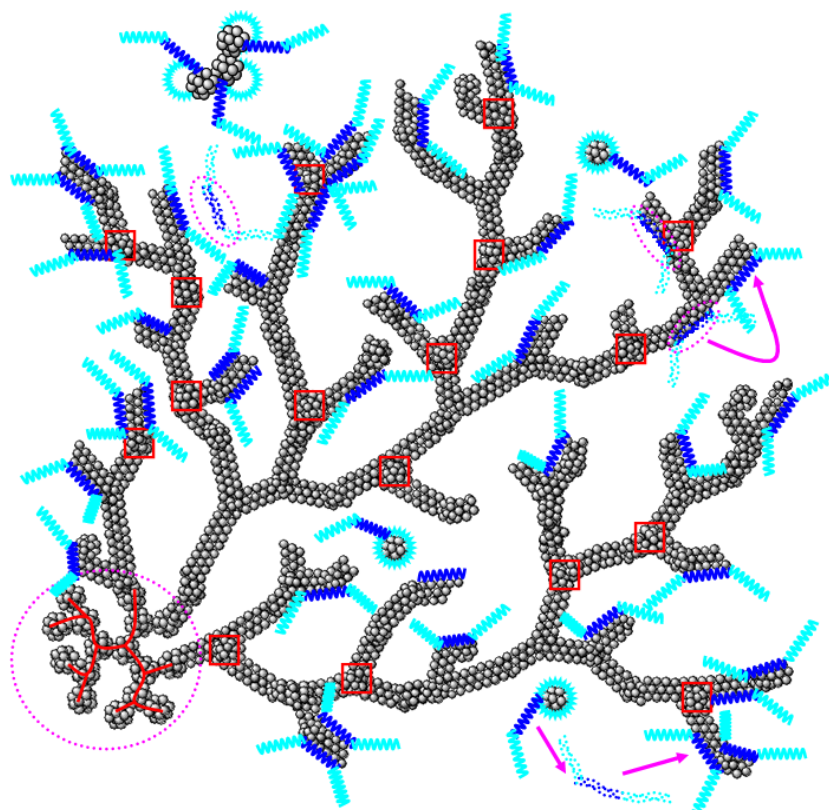

**Fig. S2** Geometric model of Pluronic F127 continue to migrate from low energy point to high region, the steric effect of hydrophobic PPO mediated Pt-NDs oriented growth into 3D nano-submicron B-Pt.

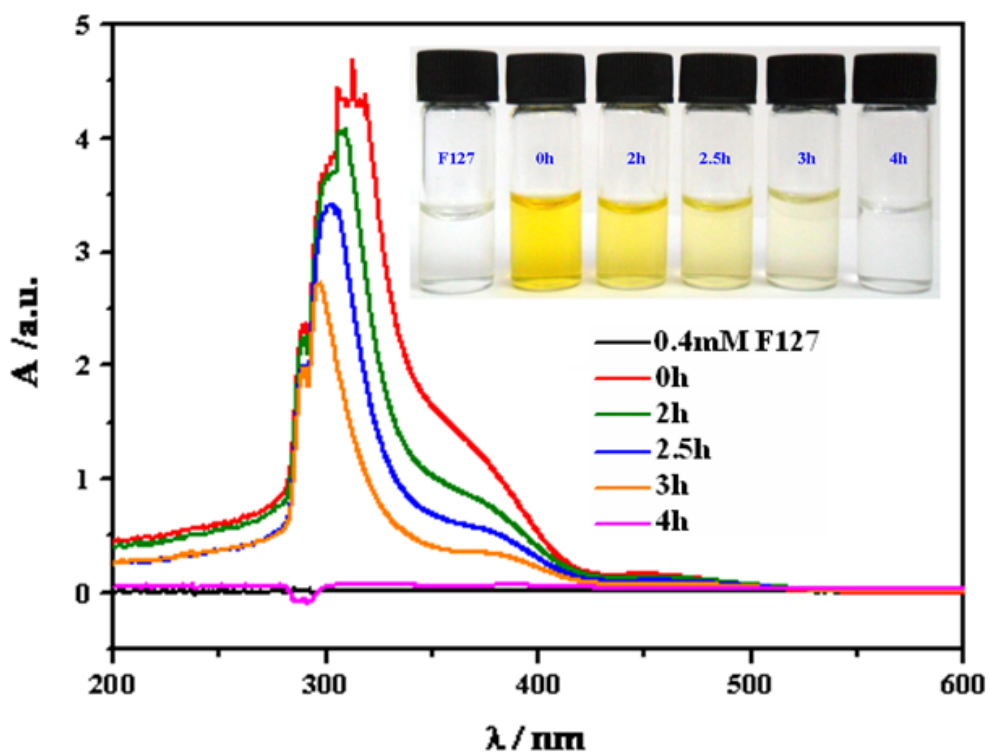

**Fig. S3** UV spectrum of the supernatant reaction solution at different reflux times.

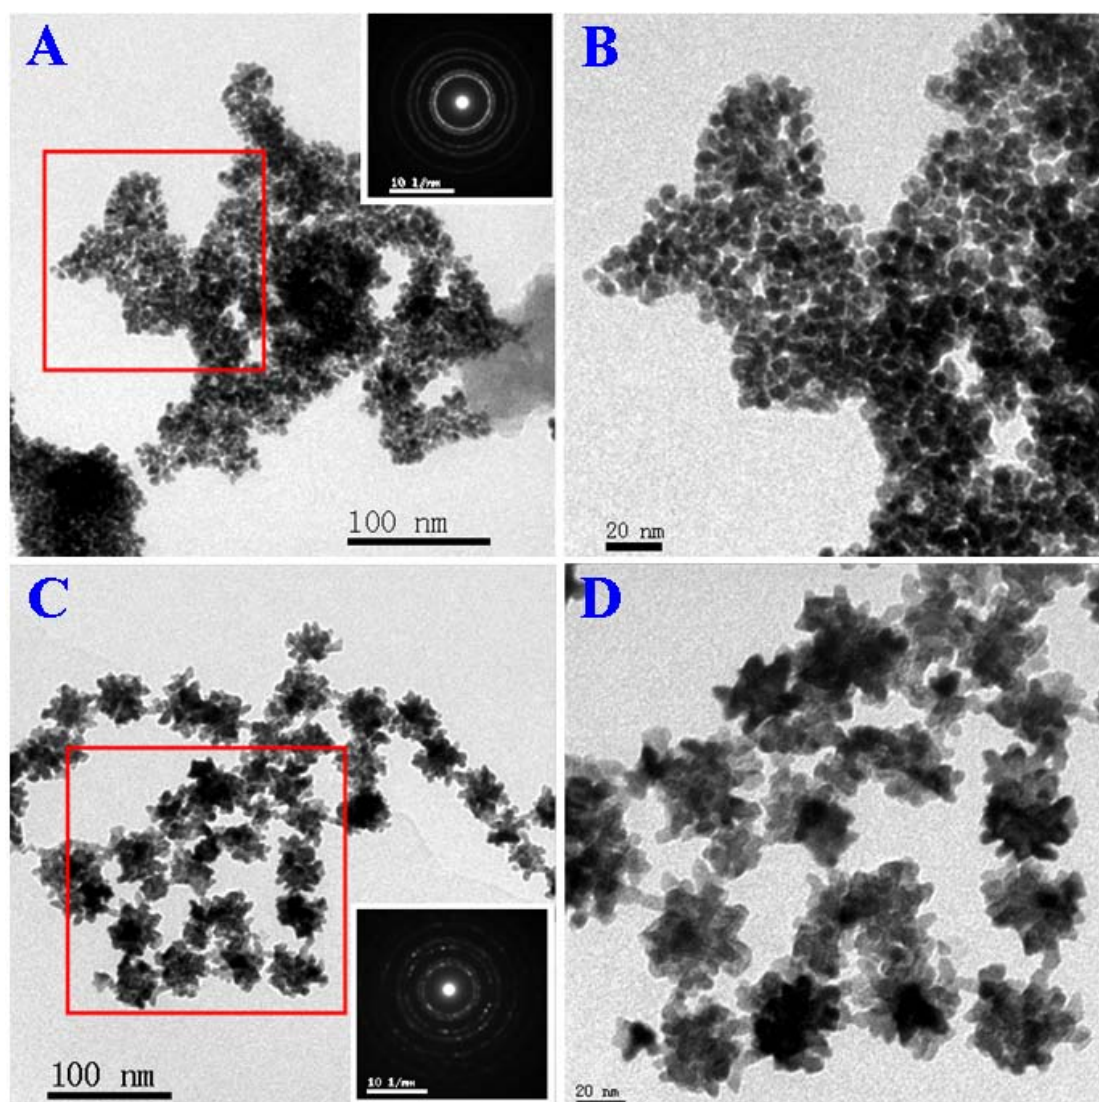

**Fig. S4** (A, B) TEM images of the monodisperse Pt nanoparticles synthesized with  $1\text{mMolL}^{-1}$  PEG6000. (C, D) TEM images of the spiny Pt nanoclusters synthesized with  $0.5\text{mMolL}^{-1}$  P123.

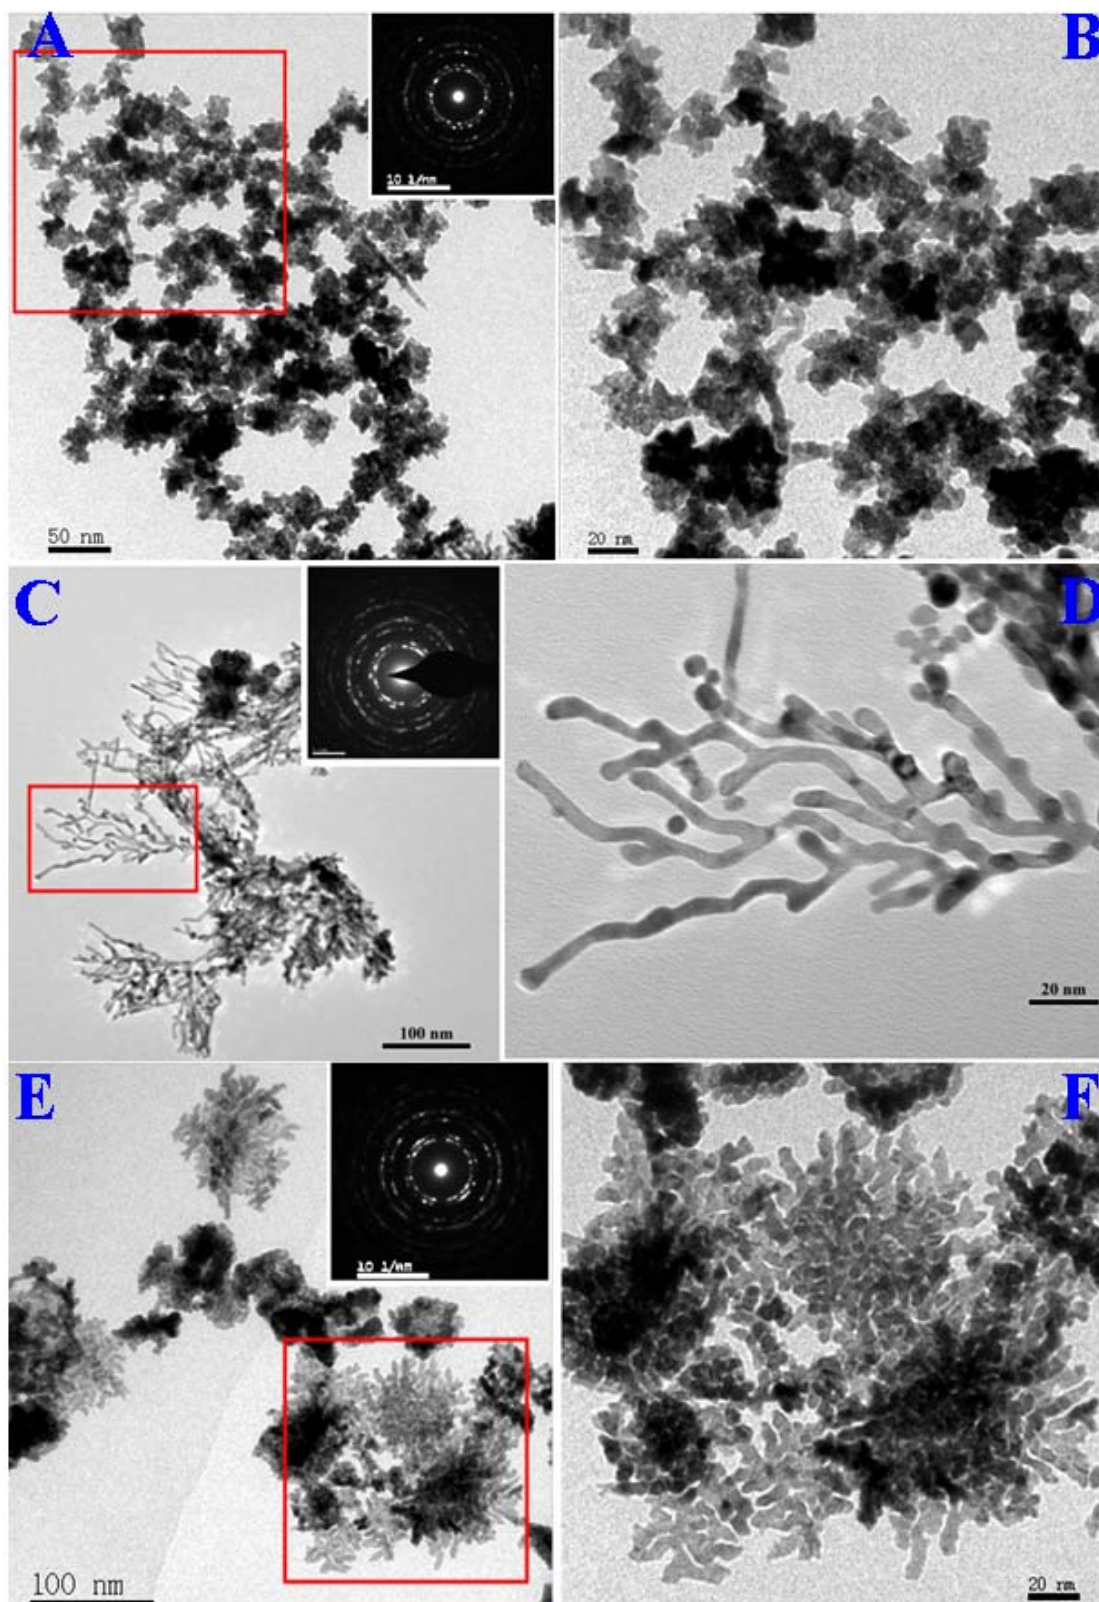

**Fig. S5** TEM images of the Pt nanocrystal synthesized with different concentrations of Pluronic F127 (A, B)  $0.08 \text{ mMolL}^{-1}$ , (C, D)  $0.4 \text{ mMolL}^{-1}$ , (E, F)  $2 \text{ mMolL}^{-1}$

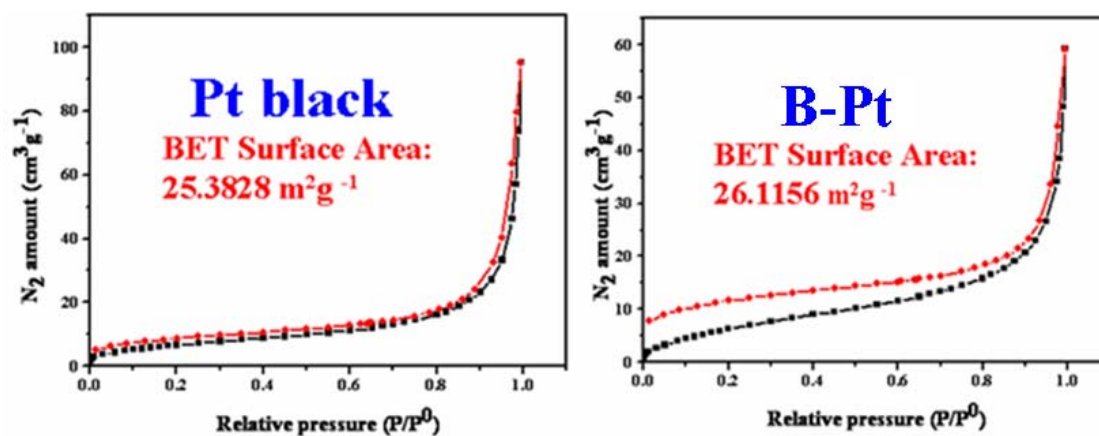

**Fig. S6** N<sub>2</sub> adsorption-desorption isotherm of the Pt black and the nano-submicron B-Pt, respectively.
